# Supplementary material for: ATF3 and JDP2 deficiency in cancer associated fibroblasts promotes tumor growth via SDF-1 transcription
Source: PubMed Central journal article supplement (PMC6756089; doi:10.1038/s41388-019-0692-y), 2019-01-22

S1

a

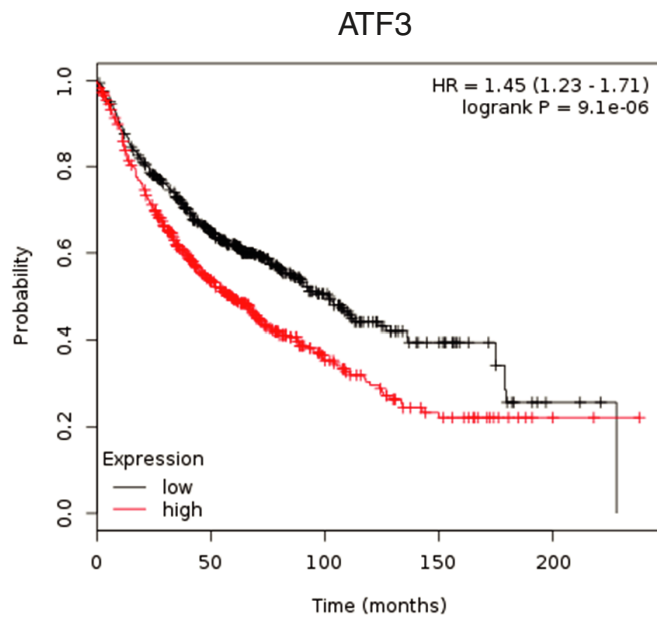

b

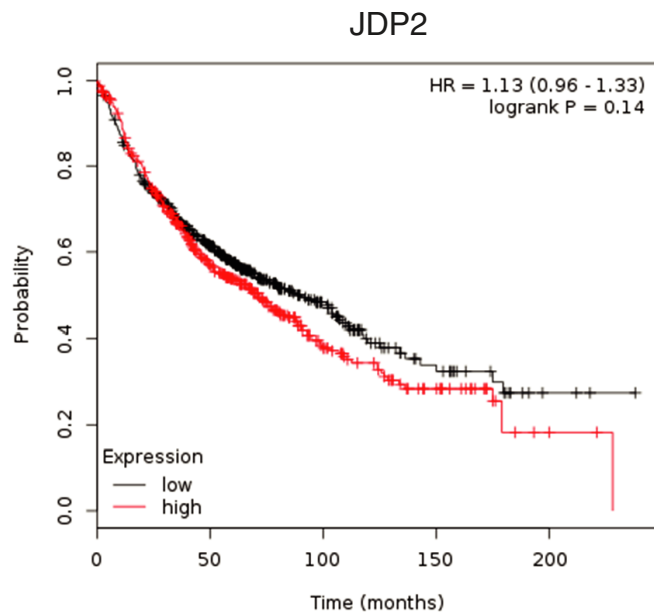

a

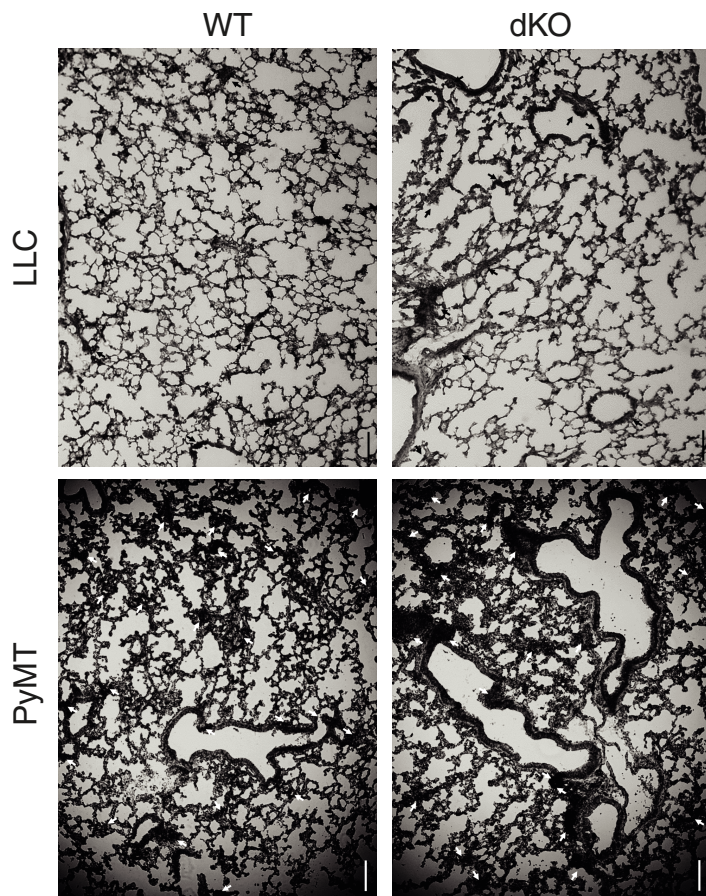

b

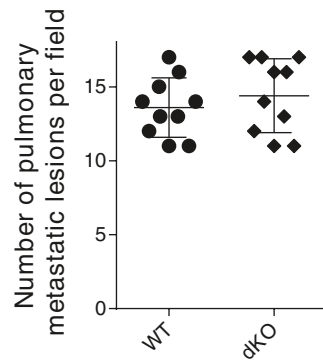

c

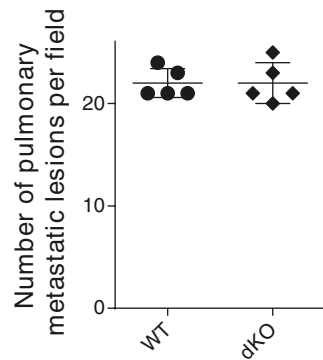

S3

a

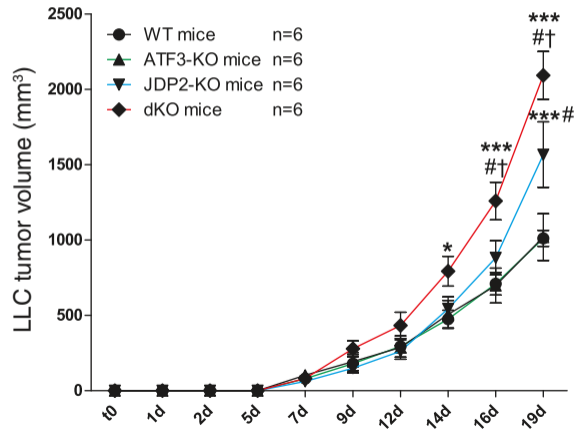

b

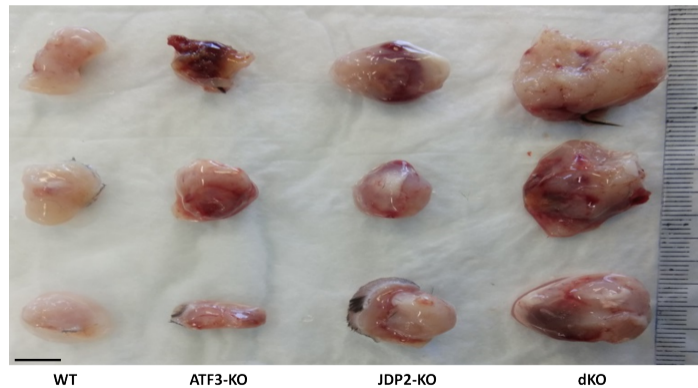

S4

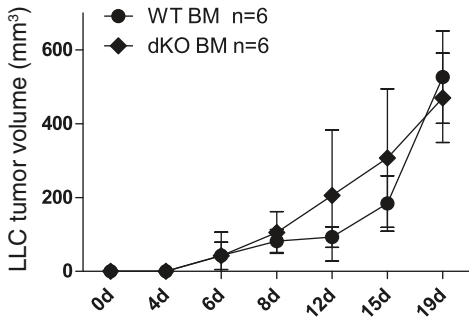

a

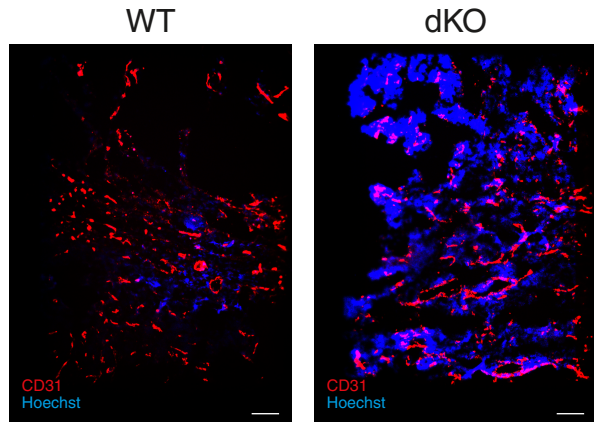

b

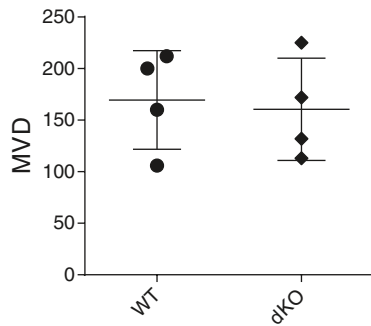

c

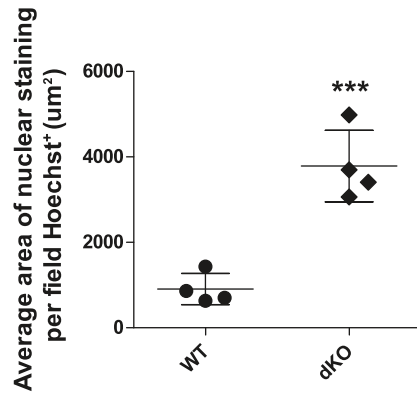

S6

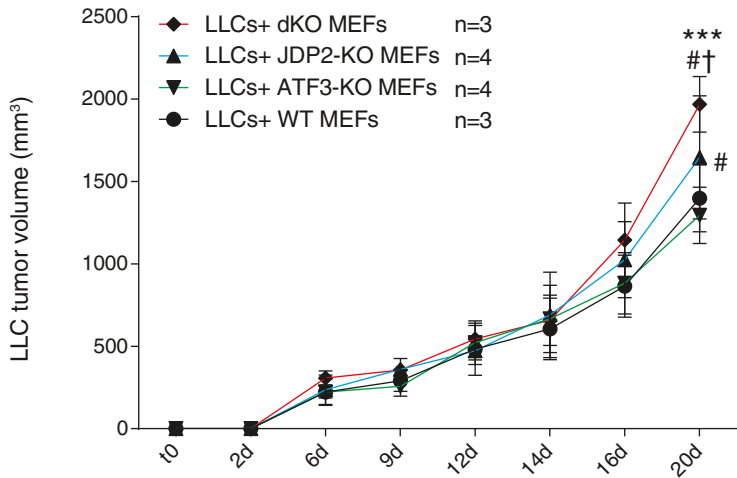

S7

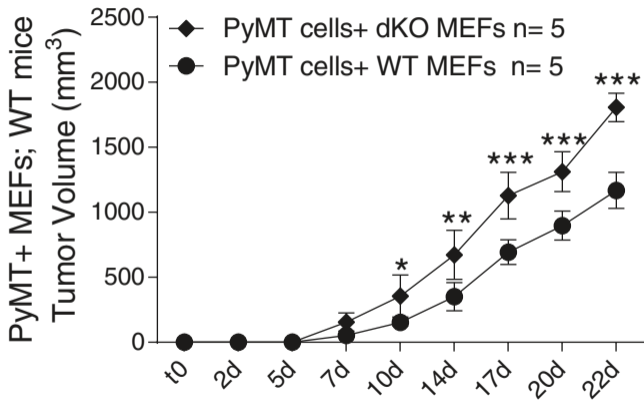

S8

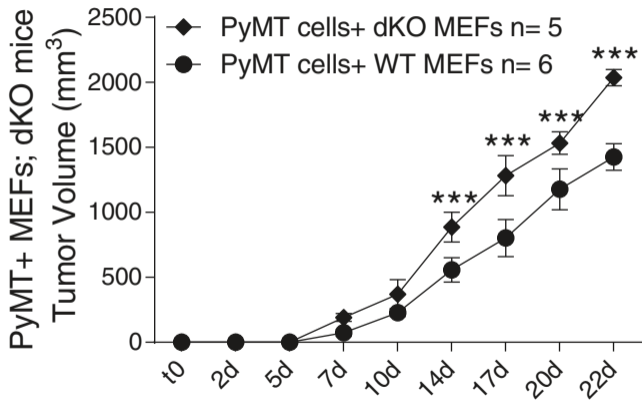



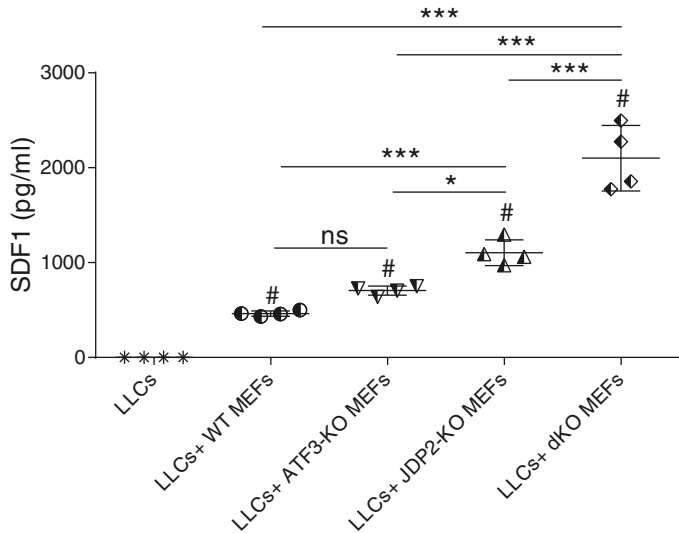

S10

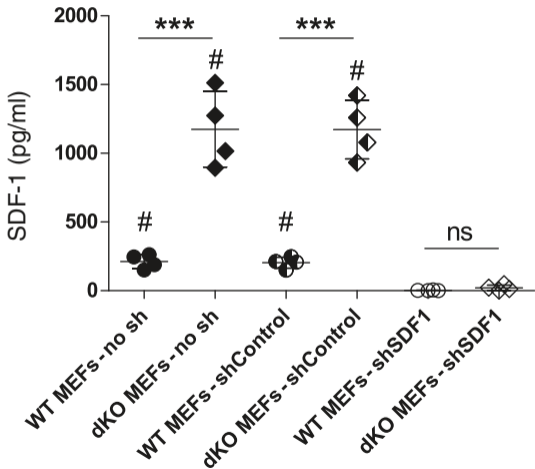

Supplement: 41388_2019_692_MOESM1_ESM.pdf [file 41388_2019_692_MOESM1_ESM.pdf]
